# Supplementary material for: Randomized Mechlorethamine/Chlormethine Induced Dermatitis Assessment Study (MIDAS) Establishes Benefit of Topical Triamcinolone 0.1% Ointment Cotreatment in Mycosis Fungoides
Source: Springer Nature journal article supplement (doi:10.1007/s13555-022-00681-6), 2022-02-05
Supplement: MOESM1 [file 20103342]

**Title: Randomized Mechlorethamine/Chlormethine Induced Dermatitis Assessment Study (MIDAS)**  
**Establishes Benefit of Topical Triamcinolone 0.1% Ointment Cotreatment in Mycosis Fungoides**

Authors:

Carolina V. Alexander-Savino, B.S.

Rochester Skin Lymphoma Medical Group, Fairport, NY 14450

Catherine G. Chung, M.D.

Dermatology and Pathology, The Ohio State University, Columbus, OH 43210

Elaine S. Gilmore, M.D., Ph.D.

Rochester Skin Lymphoma Medical Group, Fairport, NY 14450

Sean Carroll, B.S.

Rochester Skin Lymphoma Medical Group, Fairport, NY 14450

Brian Poligone, M.D., Ph.D.

Rochester Skin Lymphoma Medical Group, Fairport, NY 14450

Rochester General Hospital Research Institute, Rochester, NY 14621

Corresponding Author:

Brian Poligone, M.D., Ph.D.

Director

Rochester Skin Lymphoma Medical Group

6800 Pittsford Palmyra Rd

Suite 150

Fairport, NY 14450

(585) 364-1188

[bpoligone@roclymphoma.com](mailto:bpoligone@roclymphoma.com)

**Supplemental Figure S1 SCORD for Valchlor Arm (vSCORD) :**

**A. What percentage of measured/treated (CAILS) skin is dermatitic?** (e.g. if there are two measured lesions that are both 50% involved with dermatitis, Score A is 50%)

Score A:

**B. Intensity:**

| <b>Redness</b>                                                                                                                 | <b>Swelling</b>                                                                                                                | <b>Oozing/Crusting</b>                                                                                                         |
|--------------------------------------------------------------------------------------------------------------------------------|--------------------------------------------------------------------------------------------------------------------------------|--------------------------------------------------------------------------------------------------------------------------------|
| <ul style="list-style-type: none"> <li>• None (0)</li> <li>• Mild (1)</li> <li>• Moderate (2)</li> <li>• Severe (3)</li> </ul> | <ul style="list-style-type: none"> <li>• None (0)</li> <li>• Mild (1)</li> <li>• Moderate (2)</li> <li>• Severe (3)</li> </ul> | <ul style="list-style-type: none"> <li>• None (0)</li> <li>• Mild (1)</li> <li>• Moderate (2)</li> <li>• Severe (3)</li> </ul> |
| Score:                                                                                                                         | Score:                                                                                                                         | Score:                                                                                                                         |

| <b>Scratch Marks</b>                                                                                                           | <b>Skin Thickening</b>                                                                                                         | <b>Dryness (in an area with no inflammation)</b>                                                                               |
|--------------------------------------------------------------------------------------------------------------------------------|--------------------------------------------------------------------------------------------------------------------------------|--------------------------------------------------------------------------------------------------------------------------------|
| <ul style="list-style-type: none"> <li>• None (0)</li> <li>• Mild (1)</li> <li>• Moderate (2)</li> <li>• Severe (3)</li> </ul> | <ul style="list-style-type: none"> <li>• None (0)</li> <li>• Mild (1)</li> <li>• Moderate (2)</li> <li>• Severe (3)</li> </ul> | <ul style="list-style-type: none"> <li>• None (0)</li> <li>• Mild (1)</li> <li>• Moderate (2)</li> <li>• Severe (3)</li> </ul> |
| Score:                                                                                                                         | Score:                                                                                                                         | Score:                                                                                                                         |

**Total Score (Max 18):** \_\_\_\_\_

**C. Total VAS Score Valchlor (average):**

**Total SCORD for Valchlor (A/5 +7B/2 +C) :** \_\_\_\_\_

| Age Range Enrolled | # Per Group |
|--------------------|-------------|
| 21-30              | 2           |
| 31-40              | 1           |
| 41-50              | 2           |
| 51-60              | 6           |
| 61-70              | 7           |
| 71-80              | 7           |
| 81-90              | 3           |

| Sex    |    |
|--------|----|
| Male   | 18 |
| Female | 10 |

| Race      |    |
|-----------|----|
| Asian     | 1  |
| Black     | 2  |
| Caucasian | 25 |

**Supplemental Figure 1: Baseline Demographics**
